# Supplementary material for: Analysis of quantitative OCT and SS-OCTA metrics three months after initiation of intravitreal faricimab for treatment-recalcitrant neovascular AMD
Source: Research Square preprint supplement (doi:10.21203/rs.3.rs-3755858/v1), 2024-02-07
Supplement: Supplementary file 1 [file f193458dedb9a23fd3b0da25.xlsx]

## Sheet: Sheet1
	Cohort Characteristics
	Patient Mean Age at First Faricimab Injection – Mean ± SD		81.75 ± 7.04
	Average Time from First Anti-VEGF Treatment to First Faricimab Treatment – Mean ± SD		7 ± 3.80 years
	Previous Anti-VEGF Treatment Interval – Mean ± SD		4.82 ± 1.04 weeks
	Mean Number of Previous Anti-VEGF Injections – Mean (Range)		51.39 (3 – 166) injections
			Number of Patients
	Gender	Male	17
		Female	21
			Number of Eyes
	Previous Anti-VEGF Agents Used	Aflibercept Only	24
		Bevacizumab Only	0
		Ranibizumab Only	2
		Bevacizumab and Aflibercept	4
		Bevacizumab and Ranibizumab	1
		Ranibizumab and Aflibercept	3
		Bevacizumab, Ranibizumab, and Aflibercept	4
