# Supplementary material for: Analysis of quantitative OCT and SS-OCTA metrics three months after initiation of intravitreal faricimab for treatment-recalcitrant neovascular AMD
Source: Research Square preprint supplement (doi:10.21203/rs.3.rs-3755858/v1), 2024-02-07
Supplement: Supplementary file 2 [file ffed2653276bdee020951c93.xlsx]

## Sheet: Sheet1
		Baseline Prevalence	3-Month Prevalence	P-value
	Intraretinal Fluid (IRF)	7/38 (18.4%)	6/38 (15.8%)	0.761
	Subretinal Fluid (SRF)	21/38 (55.3%)	13/38 (34.2%)	0.065
	Pigment Epithelial Detachment (PED)	38/38 (100%)	37/38 (97.5%)	0.314
	Subretinal Hyperreflective Material (SHRM)	8/38 (21.1%)	8/38 (21.1%)	1
	Hyperreflective Foci (HRF)	28/38 (73.7%)	30/38 (78.9%)	0.59
	Retinal Pigment Epithelium (RPE) Rip	2/38 (5%)	2/38 (5.3%)	1
	Subretinal Drusenoid Deposits (SDDs)	21/38 (55.3%)	24/38 (63.2%)	0.484
	Subfoveal Hyper-transmission	13/38 (34.2%)	13/38 (34.2%)	1
